# Supplementary material
Source: MDPI journal article supplement (https://www.mdpi.com/2411-5142/2/4/42)
Supplement: s1 [file s1]

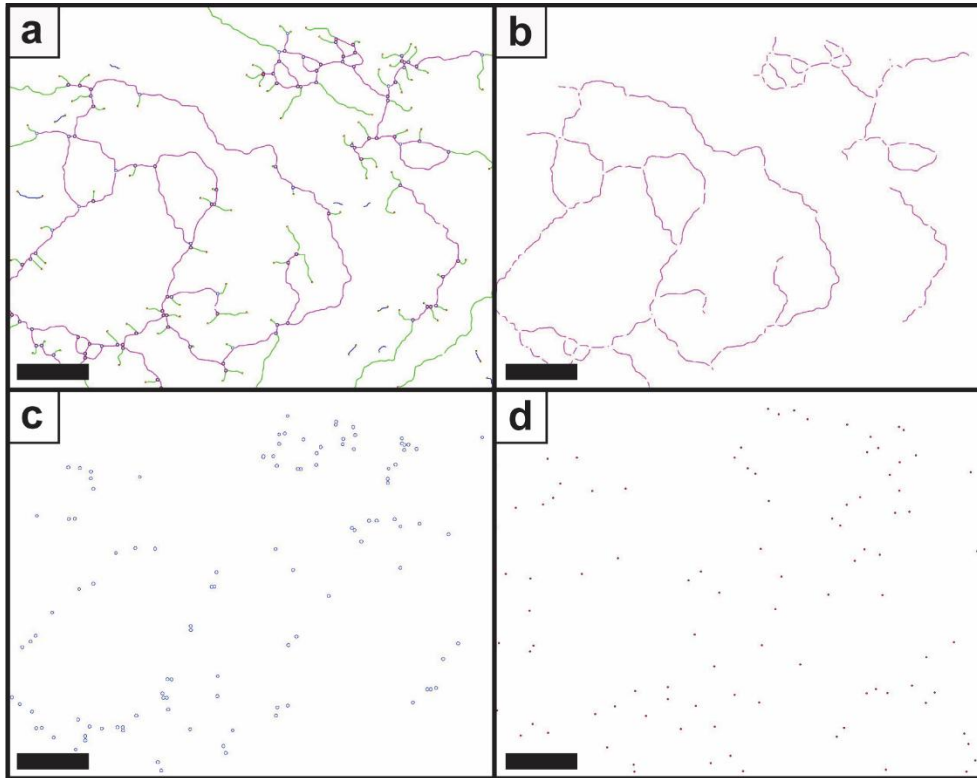

**Figure S1.** Selection and display of single elements after the image processing. The plug-in Angiogenesis Analyzer allows the feature identification and display starting from (a) the structure analysis; to (b) the node to node struts which are shown in purple; (c) the number of nodes; and (d) the number of termini. Scale bars represent 100  $\mu\text{m}$ .
